# Supplementary material for: Measuring and Sorting Cell Populations Expressing Isospectral Fluorescent Proteins with Different Fluorescence Lifetimes
Source: PubMed Central journal article supplement (PMC4193854; doi:10.1371/journal.pone.0109940), 2014-10-10

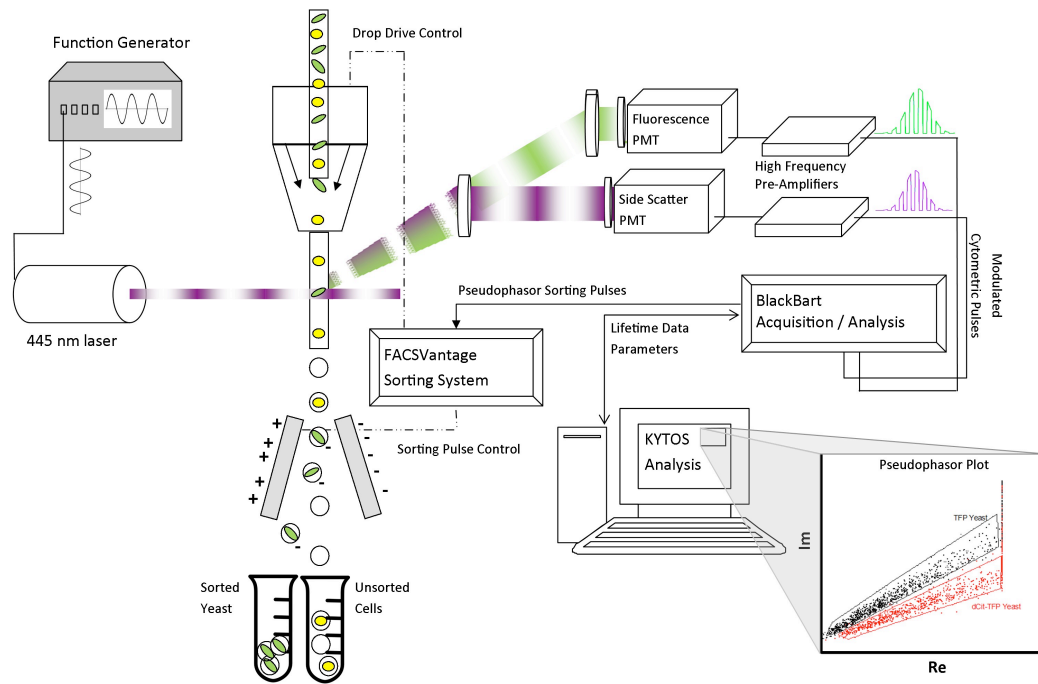

Supplement: pone.0109940.s001.pdf [file pone.0109940.s001.pdf]
