# Supplementary material for: Measuring and Sorting Cell Populations Expressing Isospectral Fluorescent Proteins with Different Fluorescence Lifetimes
Source: PubMed Central journal article supplement (PMC4193854; doi:10.1371/journal.pone.0109940), 2014-10-10
Supplement: pone.0109940.s015.pdf [file pone.0109940.s015.pdf]

| Primer | Sequence                                                        |
|--------|-----------------------------------------------------------------|
| BS1    | <u>AAGCTT</u> ATGTCTAAAGGTGAAGAATTATTCAC                        |
| BS2    | <u>GCGGCCGCTT</u> ATTTGTACAATTCATCCATACCAT                      |
| BS3    | GCTACTTACGGTAAATTGACCTTAAAATTGATTTGTACTACTGGTAAATTGCC           |
| BS4    | CATTACTTATCCTATCAATCTAAGTTATCCAAAGATCCAAACGAAAAG                |
| BS5    | GGTCACAAATTGGAATACAACCTGGAACCTCACAATGTTTACATC                   |
| BS6    | GACCACATGGTCTTGTAGAAAGAGTTACTGCTGCTGGTATTACCCATG                |
| BS7    | CTCCAAGCTTATGGTGTCCAAAGGCG                                      |
| BS8    | GGCC <u>GCGGCCGCTT</u> ATTTGTAGAGTTCGTCCATACC                   |
| BS9    | GTCGTA <u>AAGCTT</u> ATGTCTAAAGGTGAAGAATTATTCAC                 |
| BS10   | GTCGA <u>AAGCTT</u> ACCACCACTTCCACCTTTGTACAATTCATCCATACCATGGGTA |

Restriction sites are underlined
